# Supplementary material for: PDX1 DNA Methylation Distinguishes Two Subtypes of Pancreatic Neuroendocrine Neoplasms with a Different Prognosis
Source: MDPI journal article supplement (doi:10.3390/cancers12061461), 2020-06-04
Supplement: s1 [file s1]

# PDX1 DNA Methylation Distinguishes Two Subtypes of Pancreatic Neuroendocrine Neoplasms with a Different Prognosis

Gitta Boons <sup>1,2</sup>, Timon Vandamme <sup>1,2,3,4</sup>, Joe Ibrahim <sup>1,2</sup>, Geert Roeyen <sup>5</sup>, Ann Driessen <sup>6</sup>, Dieter Peeters <sup>7,8</sup>, Ben Lawrence <sup>9,10</sup>, Cristin Print <sup>10,11</sup>, Marc Peeters <sup>1</sup>, Guy Van Camp <sup>1,2</sup> and Ken Op de Beeck <sup>1,2,\*</sup>

- <sup>1</sup> Center for Oncological Research, University of Antwerp and Antwerp University Hospital, Antwerp 2610, Belgium
  - <sup>2</sup> Center of Medical Genetics, University of Antwerp and Antwerp University Hospital, Edegem 2650, Belgium
  - <sup>3</sup> Section of Endocrinology, Department of Internal Medicine, Erasmus Medical Center, Rotterdam 3015GD, Netherlands
  - <sup>4</sup> NETwerk, Antwerp University Hospital, Edegem 2650, Belgium
  - <sup>5</sup> Department of Hepatobiliary, Endocrine and Transplantation Surgery, Antwerp University Hospital, Edegem 2650, Belgium
  - <sup>6</sup> Department of Pathology, Antwerp University Hospital and University of Antwerp, Edegem 2650, Belgium
  - <sup>7</sup> Histopathology, imaging and quantification unit, HistoGeneX, Antwerp 2610, Belgium
  - <sup>8</sup> Department of Pathology, AZ Sint-Maarten, Mechelen 2800, Belgium
  - <sup>9</sup> Discipline of Oncology, Faculty of Medicine and Health Sciences, University of Auckland, Auckland 1023, New Zealand
  - <sup>10</sup> Maurice Wilkins Centre hosted by the University of Auckland, Auckland 1023, New Zealand
  - <sup>11</sup> Department of Molecular Medicine and Pathology, School of Medical Sciences, Faculty of Medicine and Health Sciences, University of Auckland, Auckland 1023, New Zealand
- \* Correspondence: ken.opdebeeck@uantwerpen.be; Tel.: +32-3275-97-91

## Supplementary

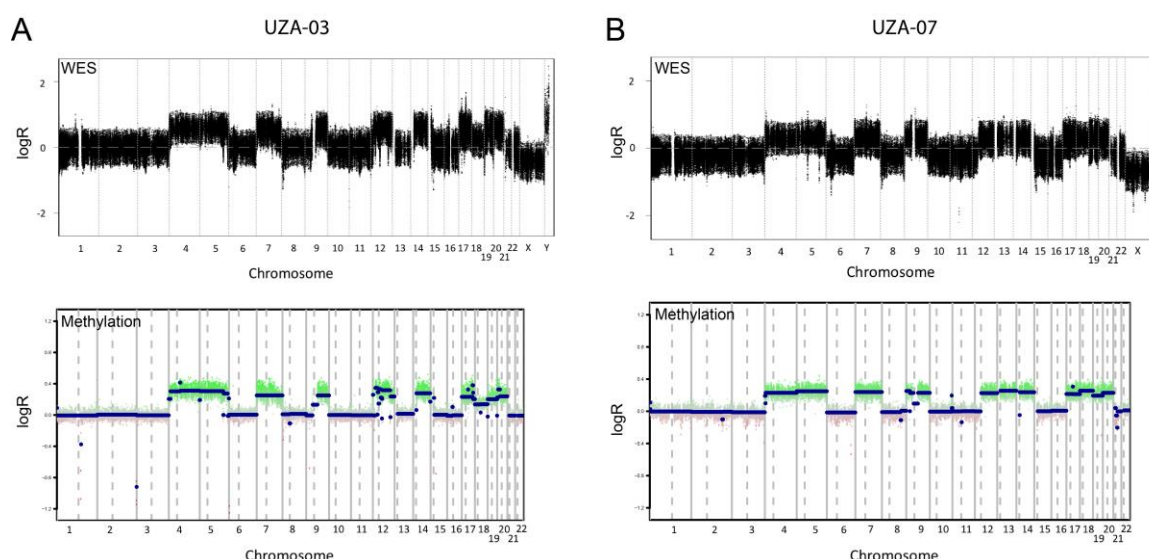

**Figure S1.** Comparison of copy number alteration profiles of (A) UZA-03 and (B) UZA-07 as determined via whole-exome sequencing (WES, top) and DNA methylation analysis (Methylation, bottom).
